# Supplementary material for: Differential Expression of Endogenous Retroviruses and Inflammatory Mediators in Female and Male Offspring in a Mouse Model of Maternal Immune Activation
Source: MDPI journal article supplement (doi:10.3390/ijms232213930), 2022-11-11
Supplement: s1 [file s1]

Archive with 6 entries (6 files):
- Supplementary Figure S1.pdf
- Supplementary Materials and methods.pdf
- Supplementary Table S1.xlsx
- Supplementary Table S2.xlsx
- Supplementary Table S3.xlsx
- Supplementary Table S4.xlsx
