# Supplementary material for: Differential Expression of Endogenous Retroviruses and Inflammatory Mediators in Female and Male Offspring in a Mouse Model of Maternal Immune Activation
Source: MDPI journal article supplement (doi:10.3390/ijms232213930), 2022-11-11
Supplement: s1 [file s1 › Supplementary Table S1.xlsx]

## Sheet: Supplementary Table S1
Supplementary Table S1. Median value, interquartile range (IQR) and p-values of the expression levels of ERVs, ERV-related genes, and inflammatory effectors in pre-frontal cortex, hippocampus and blood samples from vehicle-treated mice and Poly I:C-treated mice.
		Pre-frontal cortex
			Vehicle	Poly I:C	p-value
		MusD	0.85 (0.81-1.4)*	219.14 (59.34-634.34)	<0.001
		IAP	1.06 (0.64-1.58)	32.03 (17.27-71.35)	<0.001
		LINE-1	0.78 (0.52-1.32)	1.65 (0.84-19.92)	0.2
		Syn-A	1.05 (0.66-1.65)	1.92 (1.07-7.59)	0.5
		Syn-B	0.96 (0.75-1.32)	515.84 (183.46-1473.87)	<0.001
		ARC	0.70 (0.46-1.24)	119.51 (83.81-218.67)	<0.001
		GLN	0.96 (0.71-1.42)	1.33 (0.79-16.63)	0.2
		ASCT1	1.13 (0.69-1.68)	1.47 (0.69-11.39)	0.3
		ASCT2	0.97 (0.71-1.55)	2.17 (0.88-18.82)	0.06
		MFSD2A	0.69 (0.38-0.97)	59.06 (7.77-97.12)	<0.001
		MORC3	0.93 (0.70-1.63)	0.73 (0.02-0.88)	1.3
		ING3	1.42 (1.01-2.21)	0.02 (0.01-0.13)	<0.001
		IL-1β	0.73 (0.26-10.32)	14.95 (2.93-45.94)	0.022
		IL-6	1.40 (0.78-3.38)	20108 (31.67-146466.64)	<0.001
		IFN-α	0.67 (0.58-2.25)	23.14 (12.19-34.52)	<0.001
		IFN-β	1.18 (0.36-2.00)	18.65 (4.84-37.24)	<0.001
		TNF-α	0.90 (0.48-2.32)	2.96 (0.70-90.38)	1.8
		TGF-β1	1.05 (0.85-1.69)	0.23 (0.15-1.57)	0.1
		TLR-3	0.88 (0.52-1.19)	14.17 (12.62-22.08)	<0.001
		TLR-4	0.98 (0.70-1.33)	2.57 (1.66-21.06)	<0.001
		TLR-7	1.04 (0.47-2.61)	2.02 (1.15-28.82)	1.1
		GFAP	1.05 (0.49-1.33)	16.12 (2.75-35.35)	<0.001
		Hippocampus
			Vehicle	Poly I:C	p-value
		MusD	1.91 (0.70-3.14)	18.70 (7.93-72.74)	<0.001
		IAP	1.54 (0.67-2.71)	6.65 (4.31-9.80)	<0.001
		LINE-1	1.15 (0.57-1.57)	0.14 (0.07-4.42)	1.3
		Syn-A	1.19 (1.04-1.48)	2.00 (1.29-7.31)	0.2
		Syn-B	1.95 (0.48-4.49)	1615.11 (18.14-3663.81)	<0.001
		ARC	1.01 (0.21-1.14)	2.03 (0.68-117.14)	0.08
		GLN	2.41 (0.61-2.98)	1.51 (0.13-7.09)	1.6
		ASCT1	1.07 (0.99-1.46)	1.84 (1.07-10.13)	0.9
		ASCT2	1.21 (0.68-1.78)	3.68 (1.87-12.96)	<0.001
		MFSD2A	1.20 (0.96-1.56)	171.88 (14.72-231.83)	<0.001
		MORC3	1.22 (0.88-1.50)	116.30 (1.38-255-21)	<0.001
		ING3	0.85 (0.79-1.29)	0.005 (0.004-0.20)	<0.001
		IL-1β	1.02 (0.78-2.64)	1.42 (0.86-13.25)	1.4
		IL-6	1.77 (0.56-4.99)	69284.31 (7955.20-140416.17)	<0.001
		IFN-α	1.73 (0.73-3.26)	120.11 (11.31-706.89)	<0.001
		IFN-β	1.76 (0.60-2.20)	8389.14 (433.75-13199.67)	<0.001
		TNF-α	1.74 (0.49-4.45)	3.42 (1.30-109.43)	1.2
		TGF-β1	0.83 (0.66-1.67)	0.001 (0.0009-0.004)	<0.001
		TLR-3	1.12 (0.73-1.38)	13.08 (6.09-14.28)	<0.001
		TLR-4	0.97 (0.50-1.83)	2.05 (1.53-19.01)	0.040
		TLR-7	2.94 (0.62-6.31)	6.47 (3.00-99.21)	0.9
		GFAP	1.30 (0.81-1.48)	1.70 (1.10-2.54)	0.8
		Blood
			Vehicle	Poly I:C	p-value
		MusD	1.70 (0.87-2.78)	1.23 (0.88-1.79)	1.2
		IAP	1.50 (0.50-3.37)	1.49 (1.02-2.11)	1.4
		LINE-1	0.47 (0.04-1.21)	0.50 (0.06-0.82)	1.1
		Syn-A	1.61 (1.07-5.08)	1.98 (1.12-3.33)	0.9
		Syn-B	1.79 (1.28-8.26)	8.09 (1.71-414.96)	0.1
		ARC	3.75 (0.81-7.99)	0.73 (0.13-4.38)	0.6
		GLN	1.06 (0.45-1.22)	0.78 (0.48-1.02)	0.4
		ASCT1	1.14 (0.79-7.43)	1.53 (0.41-2.31)	0.9
		ASCT2	15.63 (2.04-40.90)	21.27 (0.26-77.57)	0.6
		MFSD2A	2.84 (1.62-21.08)	2.06 (1.16-5.58)	0.2
		MORC3	25.09 (1.01-251.44)	1.78 (0.92-15.76)	0.2
		ING3	4.02 (0.56-26.07)	0.90 (0.22-4.58)	0.2
		IL-1β	5.25 (0.79-10.11)	10.01 (1.80-20.89)	0.2
		IL-6	1.28 (0.23-9.03)	6.24 (2.23-21.07)	1.1
		IFN-α	0.84 (0.52-1.11)	0.75 (0.54-1.05)	0.9
		IFN-β	0.78 (0.27-1.54)	0.24 (0.15-0.88)	1.2
		TNF-α	1.00 (0.32-5.80)	3.68 (0.99-29.30)	0.2
		TGF-β1	1.15 (0.44-5.19)	0.74 (0.32-1.40)	0.3
		TLR-3	1.19 (0.66-1.84)	0.70 (0.55-1.51)	0.2
		TLR-4	0.68 (0.24-3.33)	0.38 (0.04-0.99)	0.1
		TLR-7	2.35 (0.31-8.33)	11.79 (1.28-11820.17)	1.4
		GFAP	1.28 (0.64-2.86)	0.95 (0.60-1.31)	0.2
		* Median values (Interquartile range)
