# Supplementary material for: Differential Expression of Endogenous Retroviruses and Inflammatory Mediators in Female and Male Offspring in a Mouse Model of Maternal Immune Activation
Source: MDPI journal article supplement (doi:10.3390/ijms232213930), 2022-11-11
Supplement: s1 [file s1 › Supplementary Table S2.xlsx]

## Sheet: Supplementary Table S2
Supplementary Table S2. Median value, interquartile range (IQR) and p-values of the expression levels of ERVs, ERV-related genes, and inflammatory effectors in pre-frontal cortex from males and females prenatally exposed to Poly I:C.
			Males	Females	p-value
		MusD	62.15 (41.60-75.12)*	611.55 (322.61-936.20)	0.001
		IAP	60.23 (40.04-79.45)	17.74 (14.08-20.78)	0.010
		LINE-1	0.91 (0.75-1.17)	19.53 (6.80-26.13)	<0.001
		Syn-A	1.07 (0.86-1.21)	7.33 (4.07-9.21)	<0.001
		Syn-B	260.51 (165.46-605.16)	1310.80 (481.44-2505.93)	0.007
		ARC	90.40 (81.43-175.95)	138.90 (90.29-1217.03)	0.2
		GLN	0.80 (0.64-0.86)	15.80 (5.62-18.18)	<0.001
		ASCT1	0.70 (0.59-1.02)	11.05 (3.58-14.46)	<0.001
		ASCT2	0.94 (0.67-1.20)	18.67 (9.06-24.15)	<0.001
		MFSD2A	8.33 (6.41-122.02)	66.70 (57.87-97.12)	0.1
		MORC3	0.79 (0.72-0.88)	0.02 (0.01-1.27)	0.1
		ING3	0.14 (0.11-0.17)	0.13 (0.06-0.19)	<0.001
		IL-1β	3.05 (1.89-12.54)	39.23 (18.27-63.60)	0.001
		IL-6	35.75 (20.12-106.86)	132456.79 (67569.90-255748.62)	<0.001
		IFN-α	13.24 (8.97-20.68)	33.83 (25.18-38.95)	0.001
		IFN-β	5.15 (3.94-11.15)	36.78 (29.09-42.03)	<0.001
		TNF-α	0.71 (0.39-1.18)	89.12 (10.28-206.73)	<0.001
		TGF-β1	0.15 (0.13-0.16)	1.57 (0.86-1.90)	<0.001
		TLR-3	13.77 (12.25-14.33)	21.40 (13.53-46.69)	0.06
		TLR-4	1.69 (1.45-1.78)	20.30 (10.64-34.67)	<0.001
		TLR-7	1.15 (0.47-1.64)	27.84 (8.37-57.29)	0.001
		GFAP	18.83 (15.98-35.35)	2.85 (1.99-39.57)	0.1
		* Median values (Interquartile range)
