# Supplementary material for: Differential Expression of Endogenous Retroviruses and Inflammatory Mediators in Female and Male Offspring in a Mouse Model of Maternal Immune Activation
Source: MDPI journal article supplement (doi:10.3390/ijms232213930), 2022-11-11
Supplement: s1 [file s1 › Supplementary Table S3.xlsx]

## Sheet: Supplementary Table S3
Supplementary Table S3. Median value, interquartile range (IQR) and p-values of the expression levels of ERVs, ERV-related genes, and inflammatory effectors in hippocampus from males and females prenatally exposed to Poly I:C.
			Males	Females	p-value
		MusD	14.76 (5.09-58.42)*	30.47 (7.93-89.82)	0.5
		IAP	6.80 (2.42-10.90)	6.65 (5.06-9.60)	0.9
		LINE-1	0.54 (0.03-4.79)	0.14 (0.10-4.18)	0.9
		Syn-A	1.78 (1.11-6.18)	3.22 (1.33-11.71)	0.4
		Syn-B	1947.69 (23.16-3805.02)	1615.11 (12.78-4313.80)	0.8
		ARC	11.25 (1.02-50.00)	1.56 (0.43-231.92)	0.9
		GLN	0.90 (0.08-7.30)	3.01 (0.19-6.34)	0.8
		ASCT1	1.80 (1.01-8.43)	1.84 (1.07-16.90)	0.7
		ASCT2	3.64 (1.79-12.29)	3.87 (2.24-21.73)	0.7
		MFSD2A	127.85 (10.00-244.09)	171.88 (17.12-222.67)	0.9
		MORC3	94.09 (1.23-273.60)	170.19 (2.23-255.21)	0.8
		ING3	0.005 (0.004-0.02)	0.004 (0.003-0.04)	0.8
		IL-1β	1.25 (0.82-10.93)	5.24 (0.96-15.77)	0.4
		IL-6	52341.52 (7556.33-123739.52)	116620.65 (7491.87-190331.32)	0.5
		IFN-α	108.43 (11.95-717.76)	120.11 (9.92-713.27)	0.7
		IFN-β	10896.90 (546.23-25794.58)	7226.35 (300.35-12025.80)	0.5
		TNF-α	3.11 (1.26-120.75)	7.41 (1.26-101.28)	1
		TGF-β1	0.001 (0.0009-0.003)	0.001 (0.0009-0.009)	0.4
		TLR-3	10.82 (5.26-13.90)	13.48 (7.63-22.26)	0.3
		TLR-4	1.84 (1.15-15.27)	2.08 (1.66-28.43)	0.5
		TLR-7	4.86 (3.56-52.55)	7.00 (2.33-188.84)	0.5
		GFAP	1.60 (0.80-2.32)	2.11 (1.33-5.03)	0.3
		* Median values (Interquartile range)
