# Supplementary material for: Differential Expression of Endogenous Retroviruses and Inflammatory Mediators in Female and Male Offspring in a Mouse Model of Maternal Immune Activation
Source: MDPI journal article supplement (doi:10.3390/ijms232213930), 2022-11-11
Supplement: s1 [file s1 › Supplementary Table S4.xlsx]

## Sheet: Supplementary Table S4
Supplementary Table S4. Median value, interquartile range (IQR) and p-values of the expression levels of ERVs, ERV-related genes, and inflammatory effectors in blood samples from males and females prenatally exposed to Poly I:C.
			Males	Females	p-value
		MusD	1.34 (0.65-1.74)*	1.11 (0.95-3.03)	0.7
		IAP	1.02 (0.67-1.86)	1.67 (1.38-2.24)	0.1
		LINE-1	0.80 (0.49-1.34)	0.06 (0.04-0.52)	0.008
		Syn-A	1.63 (0.93-3.82)	2.21 (1.17-3.33)	0.5
		Syn-B	1.71 (0.71-8.52)	412.98 (8.07-613.14)	0.006
		ARC	0.45 (0.08-1.44)	0.73 (0.23-7.48)	0.3
		GLN	0.90 (0.59-1.36)	0.78 (0.41-0.88)	0.2
		ASCT1	1.66 (0.67-2.06)	1.18 (0.40-3.73)	0.8
		ASCT2	1.15 (0.25-12.35)	53.13 (36.45-144.75)	0.002
		MFSD2A	2.45 (0.66-6.10)	1.75 (1.21-5.25)	0.9
		MORC3	1.37 (0.60-1.76)	3.85 (1.96-280.23)	0.027
		ING3	1.97 (0.06-7.87)	0.90 (0.33-2.12)	1
		IL-1β	4.03 (1.19-9.83)	18.20 (6.45-29.51)	0.021
		IL-6	4.29 (2.22-14.46)	10.68 (2.40-26.04)	0.4
		IFN-α	0.93 (0.60-2.10)	0.71 (0.39-0.84)	0.1
		IFN-β	0.38 (0.18-1.07)	0.21 (0.15-0.63)	0.4
		TNF-α	7.05 (1.14-31.52)	3.68 (0.86-45.20)	0.9
		TGF-β1	0.64 (0.20-1.42)	0.74 (0.47-1.97)	0.7
		TLR-3	1.31 (0.60-1.66)	0.69 (0.48-1.14)	0.3
		TLR-4	0.18 (0.02-1.11)	0.39 (0.07-0.99)	0.4
		TLR-7	8.61 (1.84-17664.89)	11.79 (0.59-32269.50)	0.7
		GFAP	0.60 (0.38-1.23)	0.99 (0.74-1.40)	0.2
		* Median values (Interquartile range)
