# Supplementary figures and images for: Differential Expression of Endogenous Retroviruses and Inflammatory Mediators in Female and Male Offspring in a Mouse Model of Maternal Immune Activation
Source: MDPI journal article supplement (doi:10.3390/ijms232213930), 2022-11-11

**(a) Three Chamber social test**

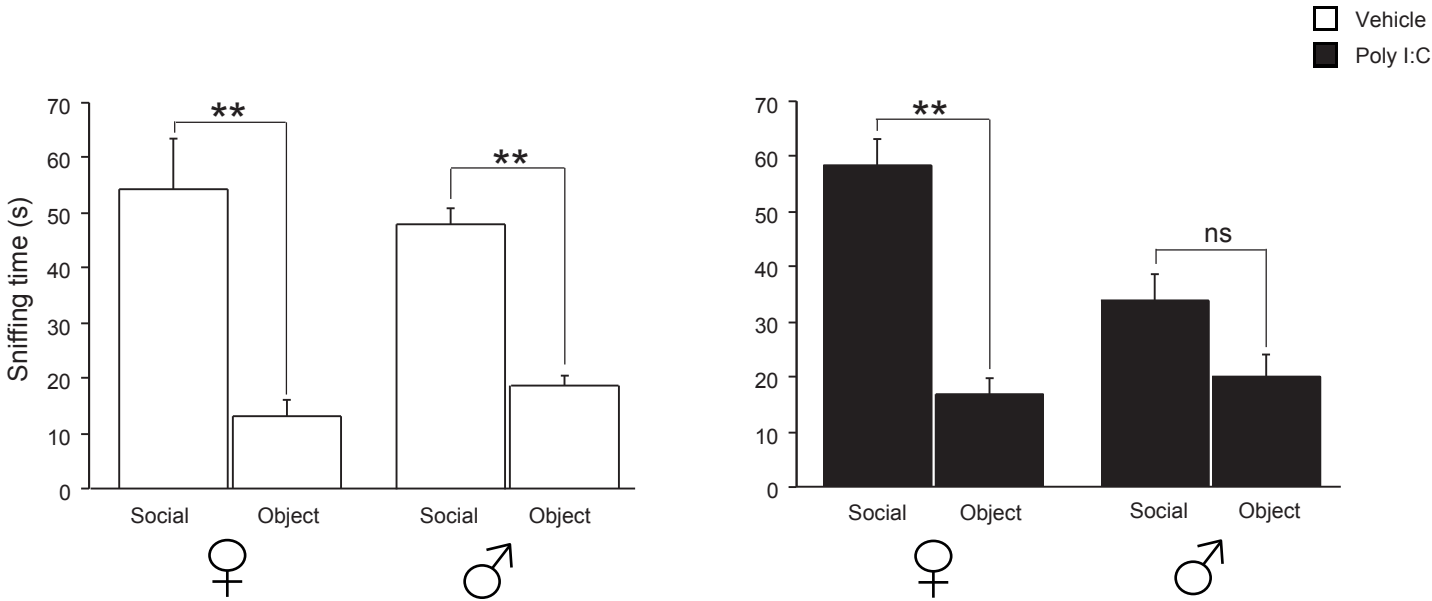

**(b) Elevated Plus Maze test**

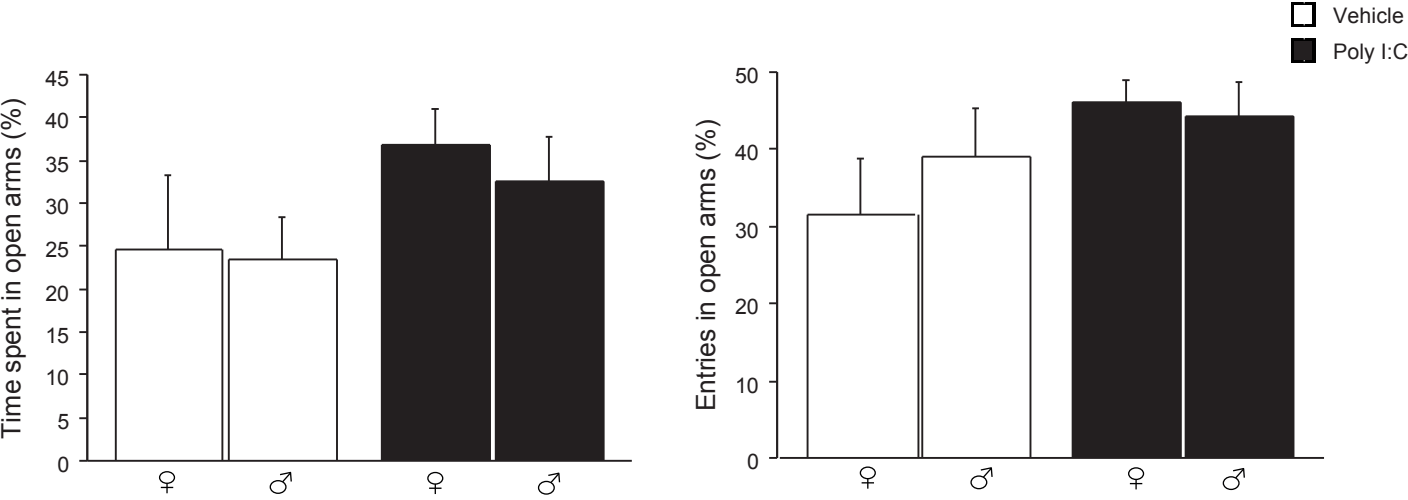

**(c) Murble Burying test**

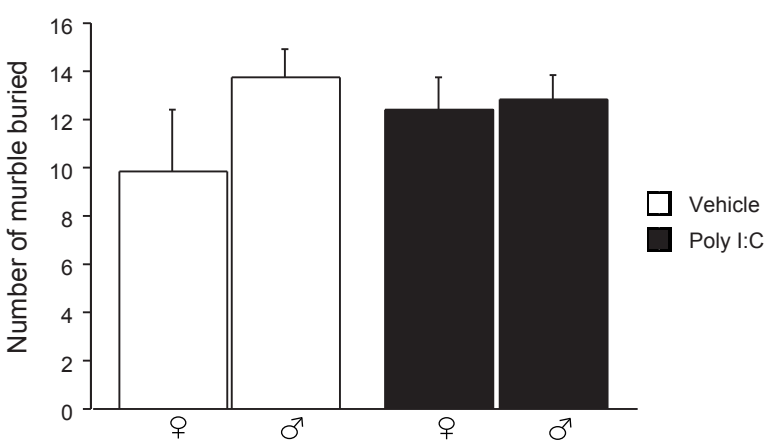

Supplement: s1 [file s1]
